# Supplementary material for: Genetic and immune determinants of E. coli liver abscess formation
Source: PubMed Central journal article supplement — bioRxiv. 2023 Jun 12:2023.06.11.543319. Preprint. [Version 1] doi: 10.1101/2023.06.11.543319 (PMC10312621; doi:10.1101/2023.06.11.543319), 2023-06-12
Supplement: NIHPP2023.06.11.543319v1-supplement-1.pdf [file NIHPP2023.06.11.543319v1-supplement-1.pdf]

**A** *E. coli*: CHS7-STAMP  
 Sex: Female  
 Time: 5 dpi  
 Dose:  $5 \times 10^6$   
 Mouse: B6J  
 Route: IV

Region without abscess

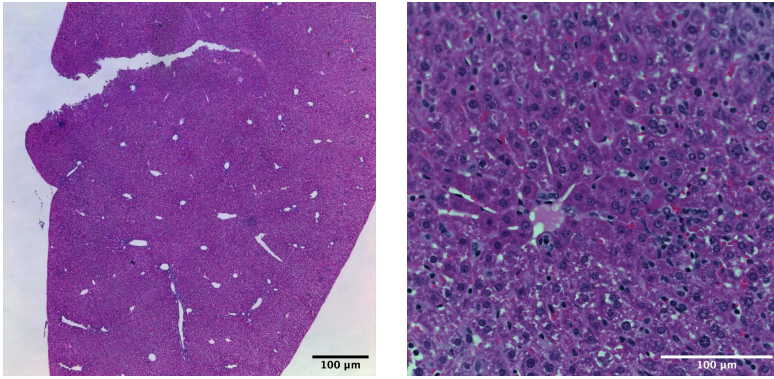

Region with abscess

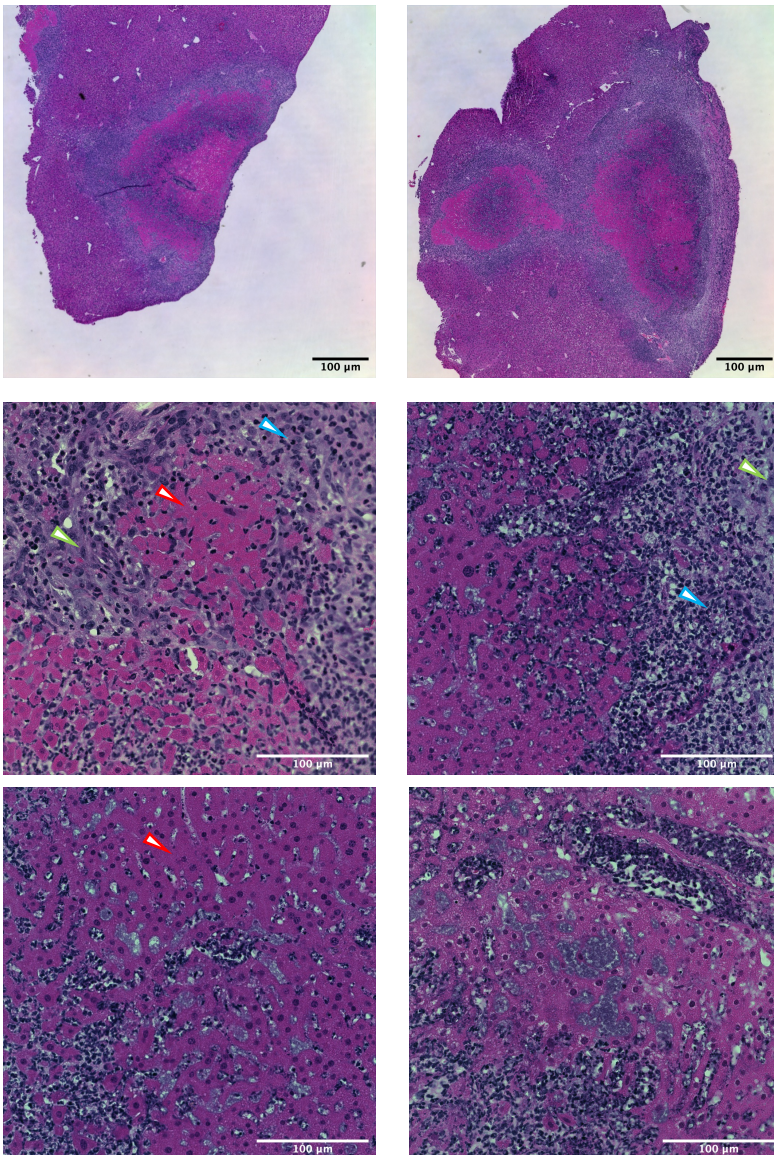

**B** *E. coli*: CHS7-STAMP  
 Dose:  $5 \times 10^6$   
 Sex: **Variable**  
 Mouse: **Variable**  
 Time: 5 dpi  
 Route: IV

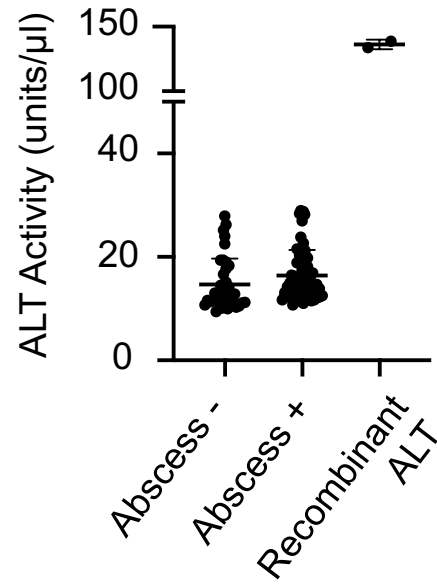

**C** *E. coli*: CHS7-STAMP  
 Dose:  $5 \times 10^6$   
 Sex: Female  
 Mouse: **B6N**  
 Time: **Variable**  
 Route: IV

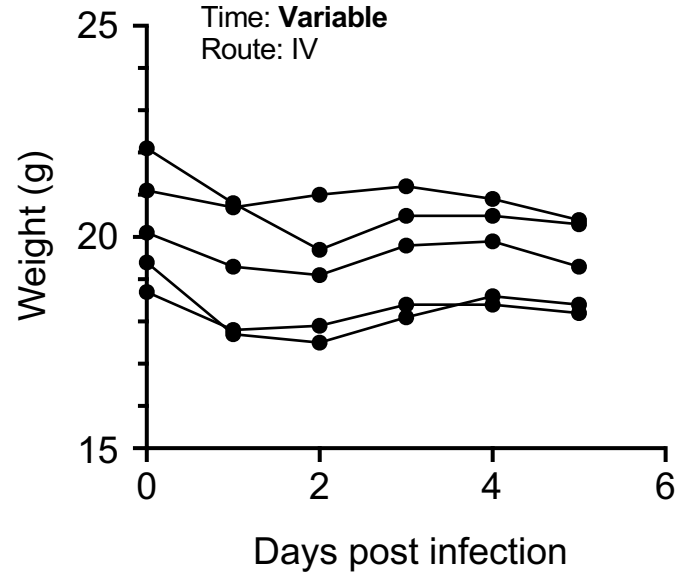

Figure S1

*E. coli*: CHS7-STAMP  
Dose: 0 (uninfected)  
Sex: Female  
Mouse: B6J  
Time: NA  
Route: IV

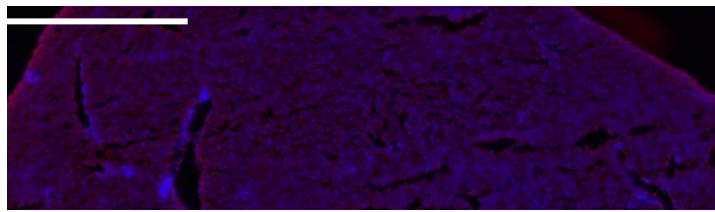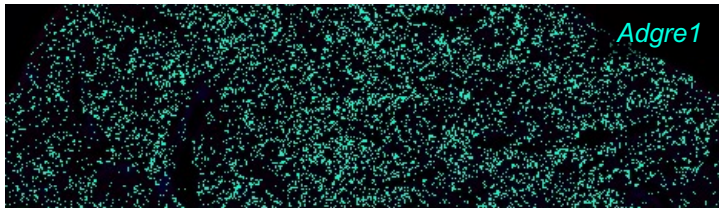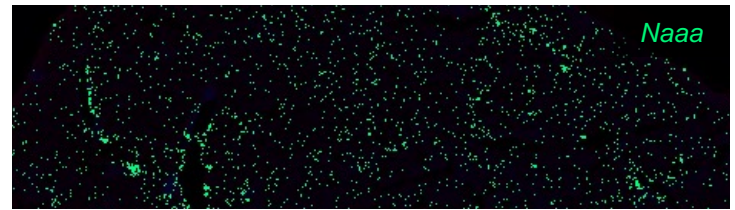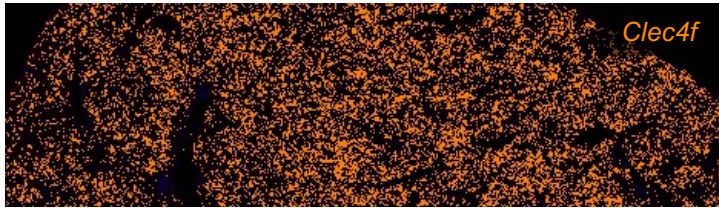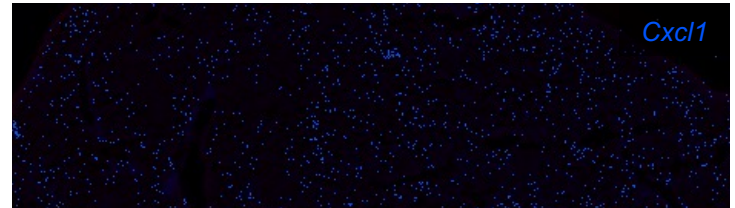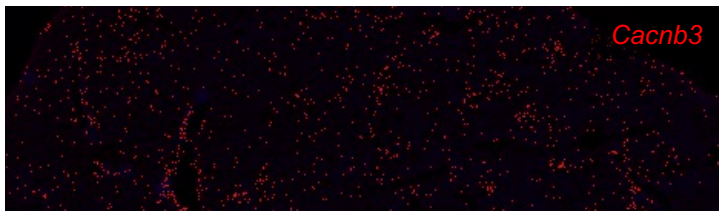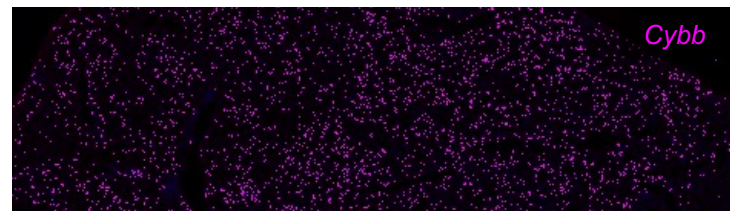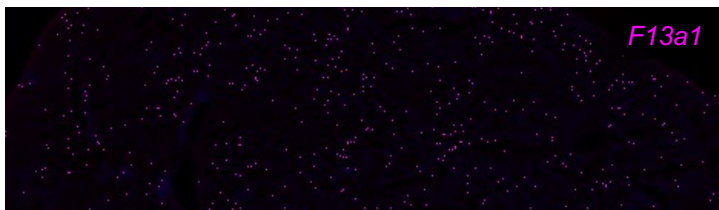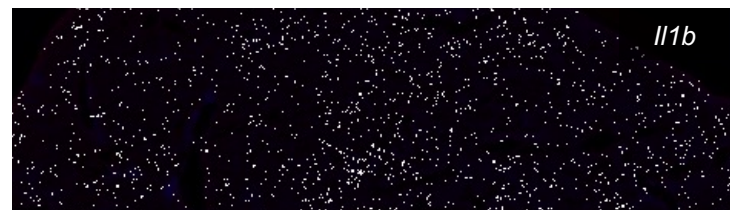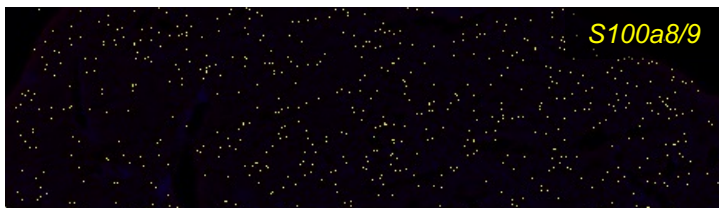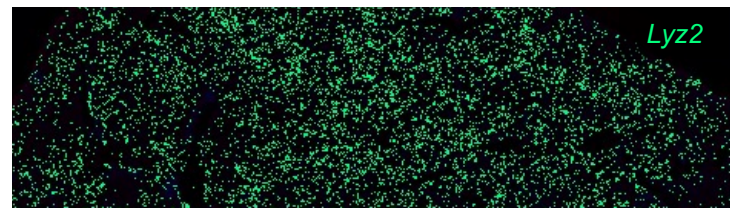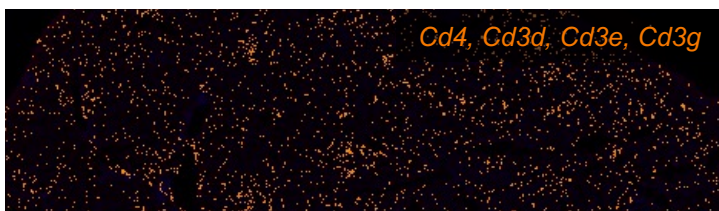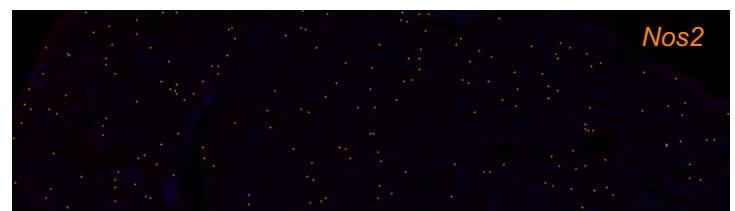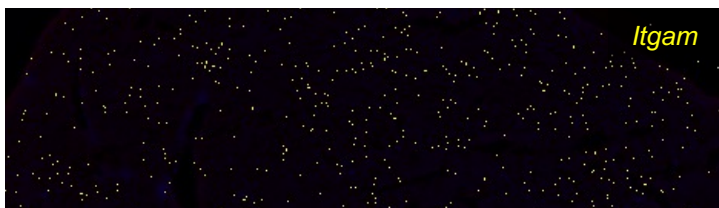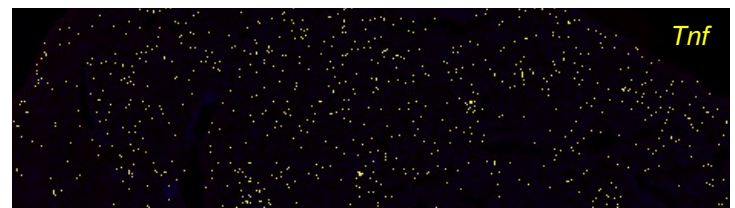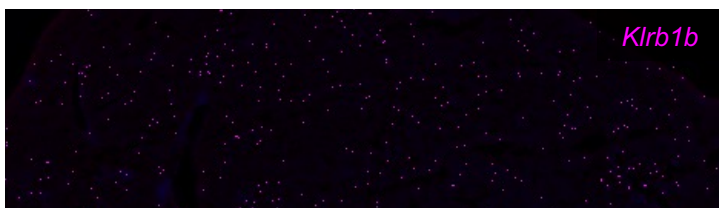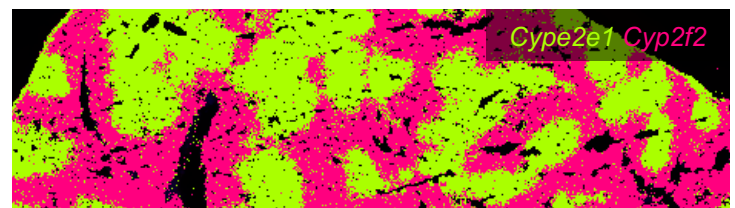

Figure S2

*E. coli*: CHS7-STAMP  
Dose:  $5 \times 10^6$   
Sex: Female  
Mouse: B6J  
Time: 3 dpi  
Route: IV

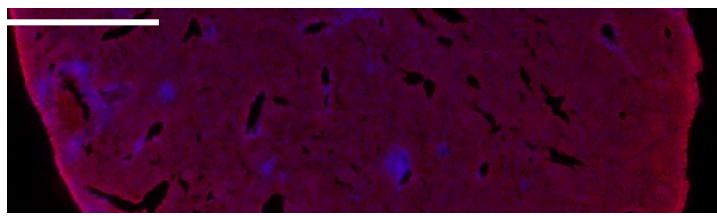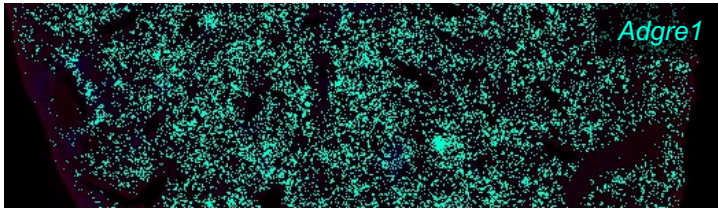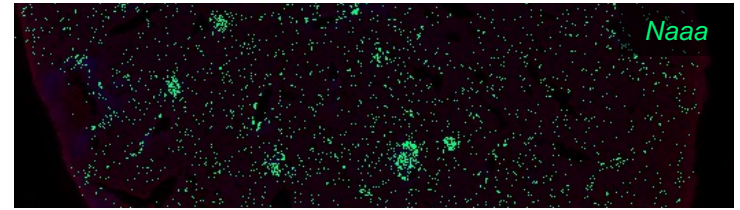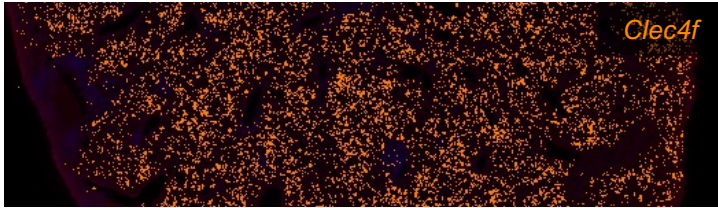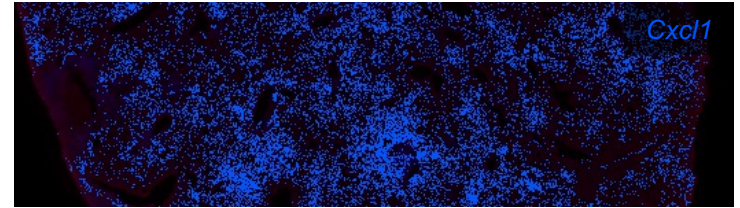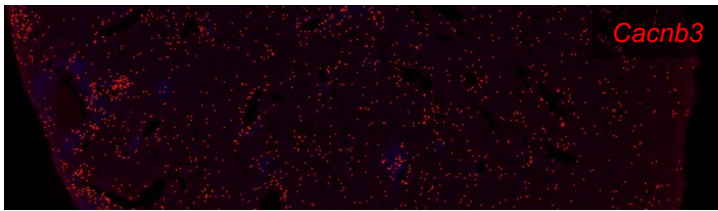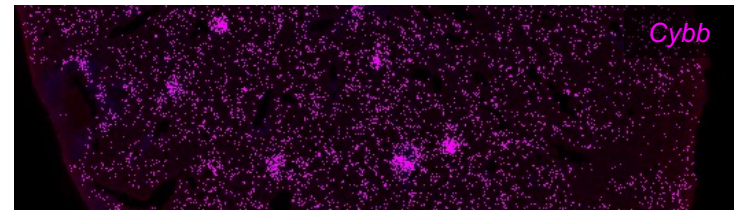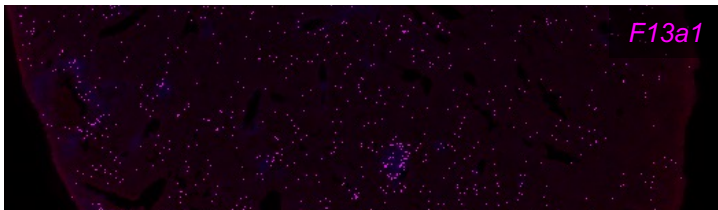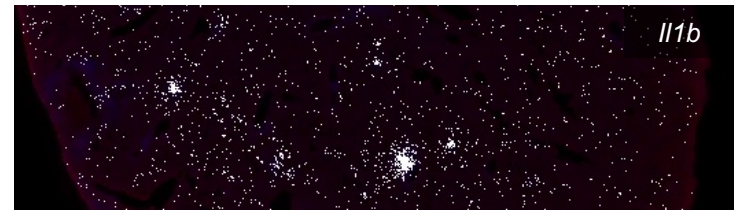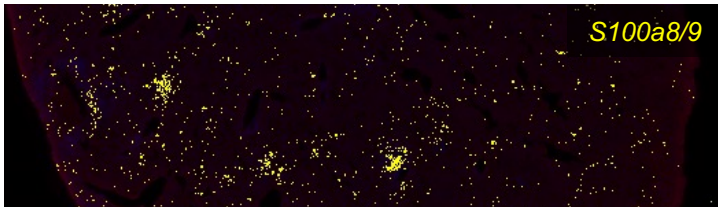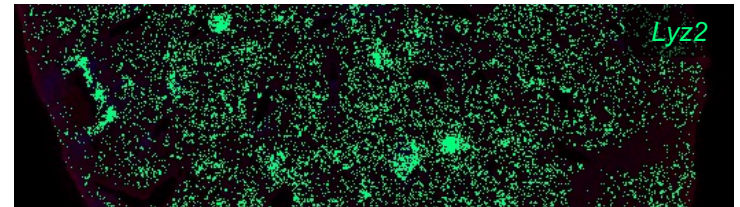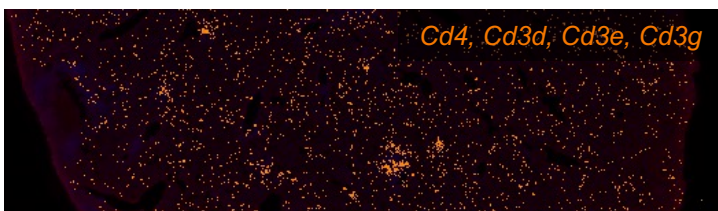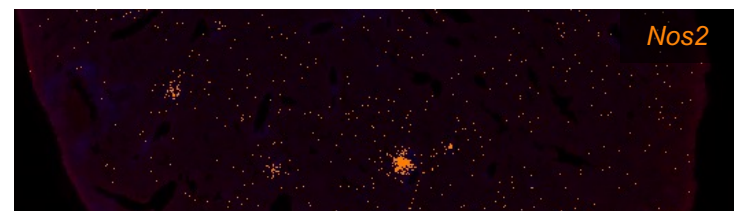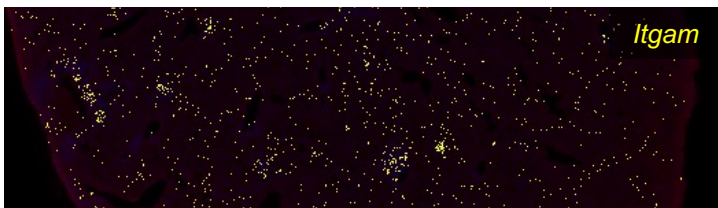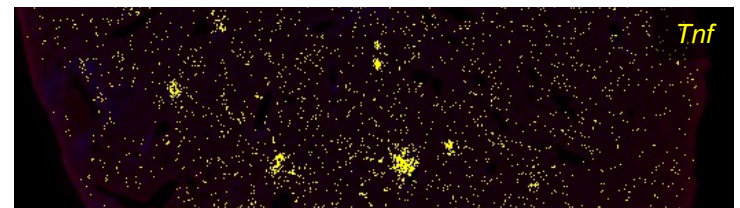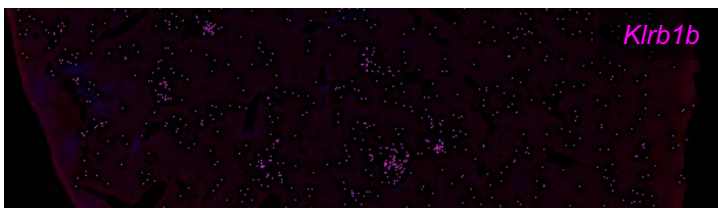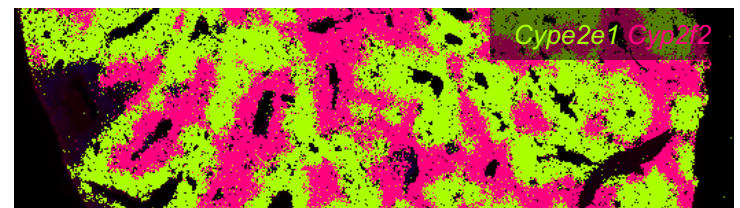

Figure S3

*E. coli*: CHS7-STAMP  
Dose:  $5 \times 10^6$   
Sex: Female  
Mouse: B6J  
Time: 5 dpi  
Route: IV

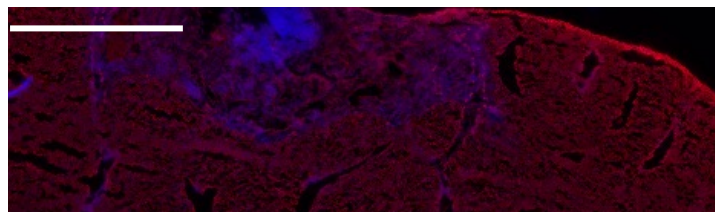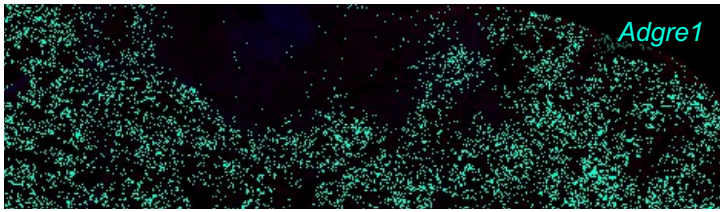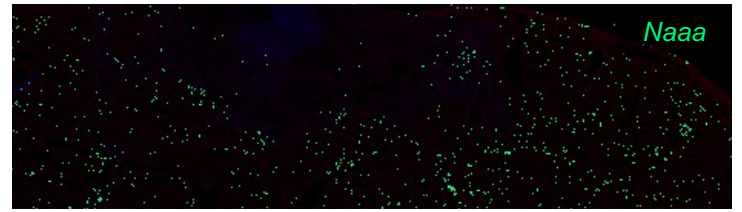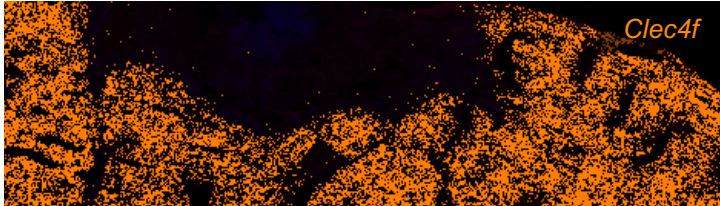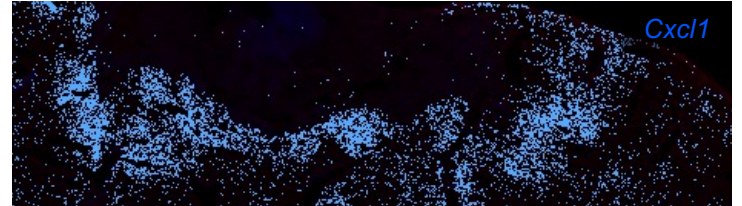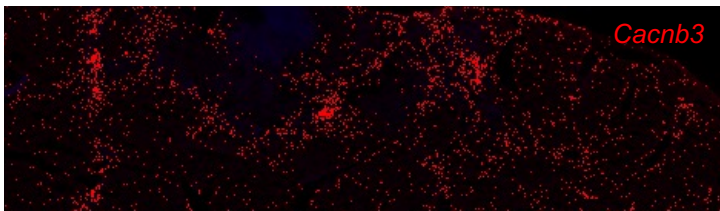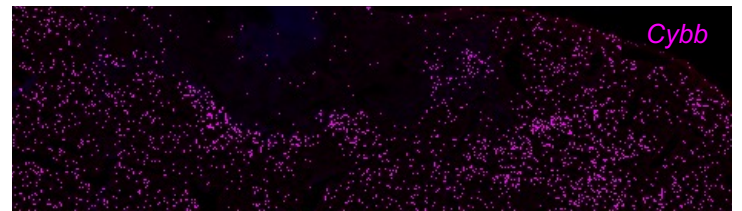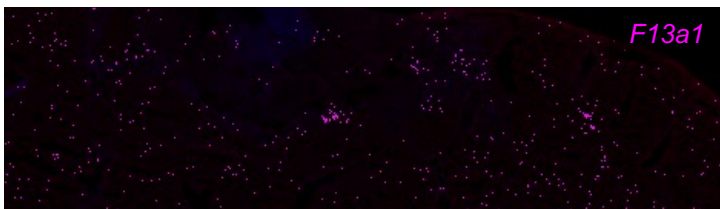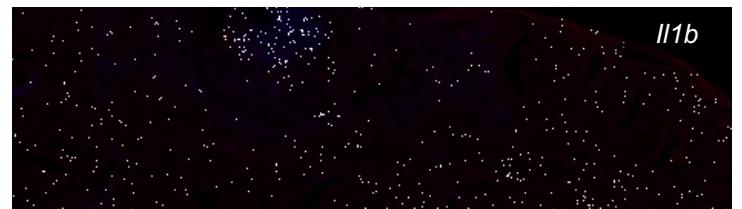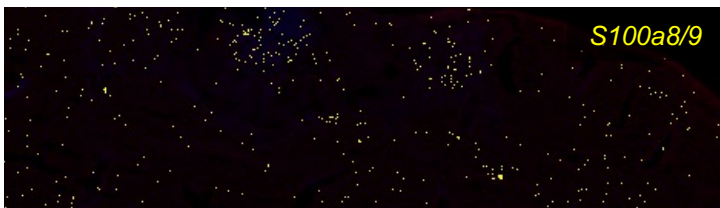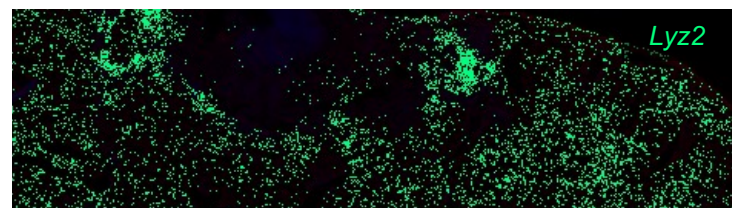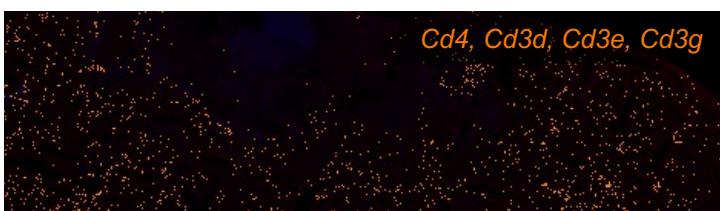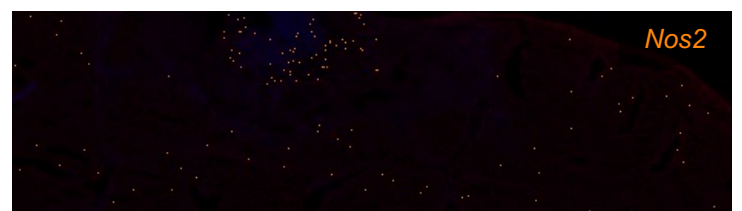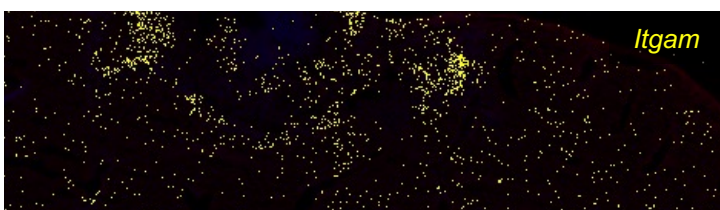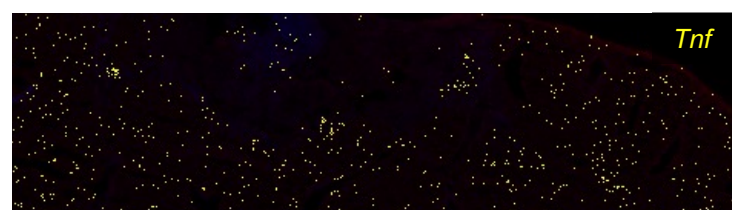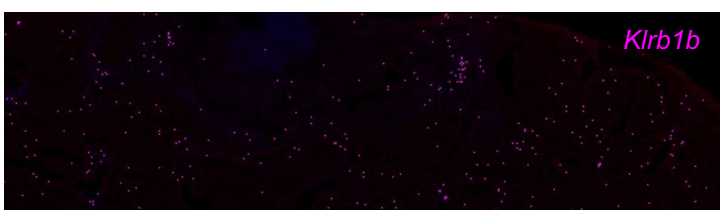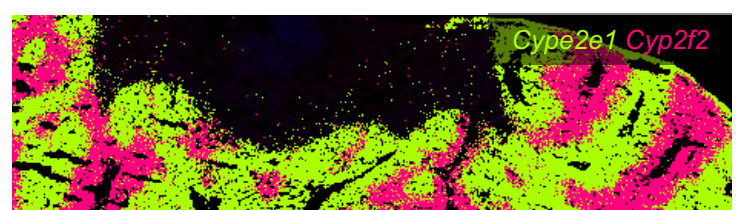

Figure S4

Log10 Relative Abundance

Abscess and border, 3 or 5 dpi  
No abscess, from the same section

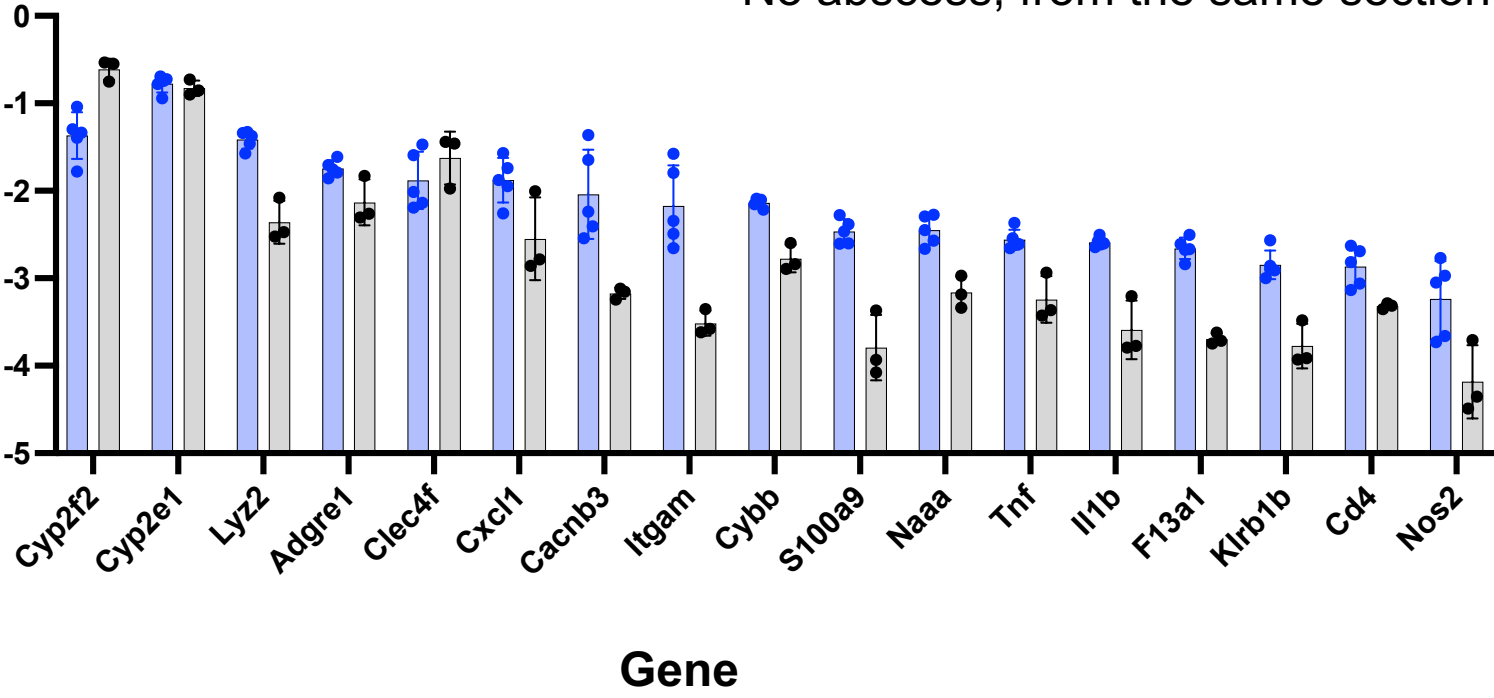

Figure S5

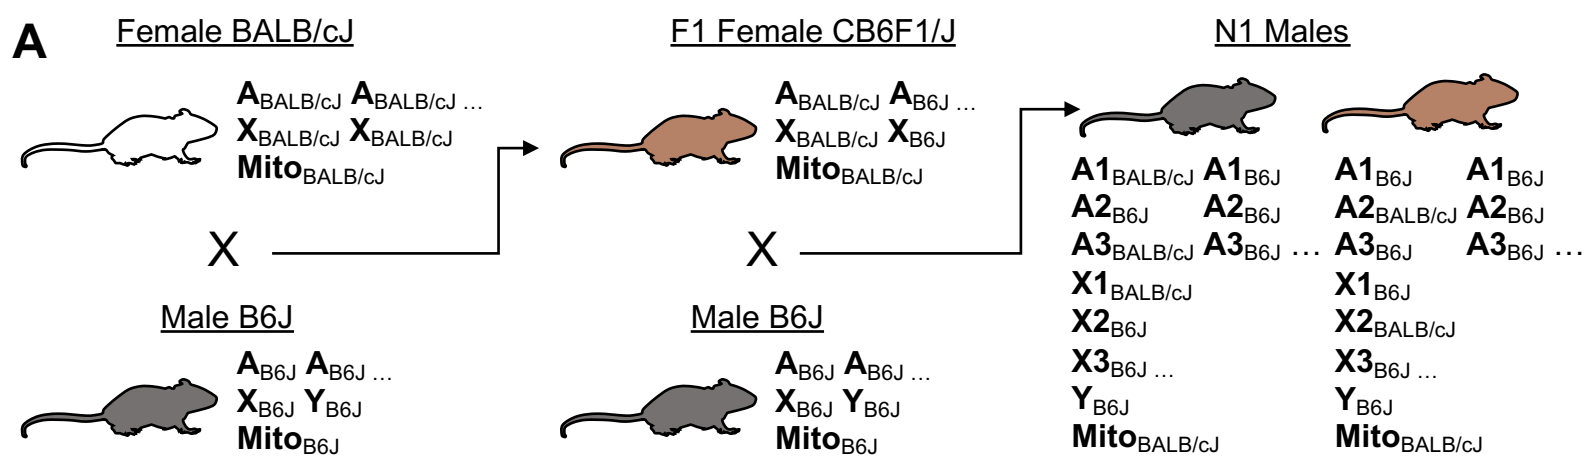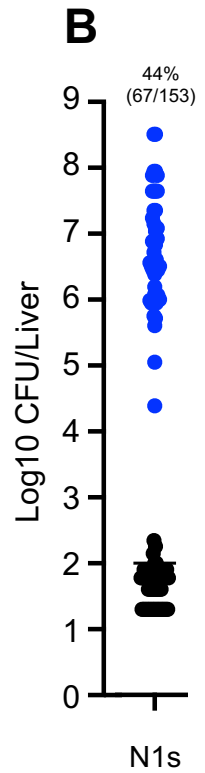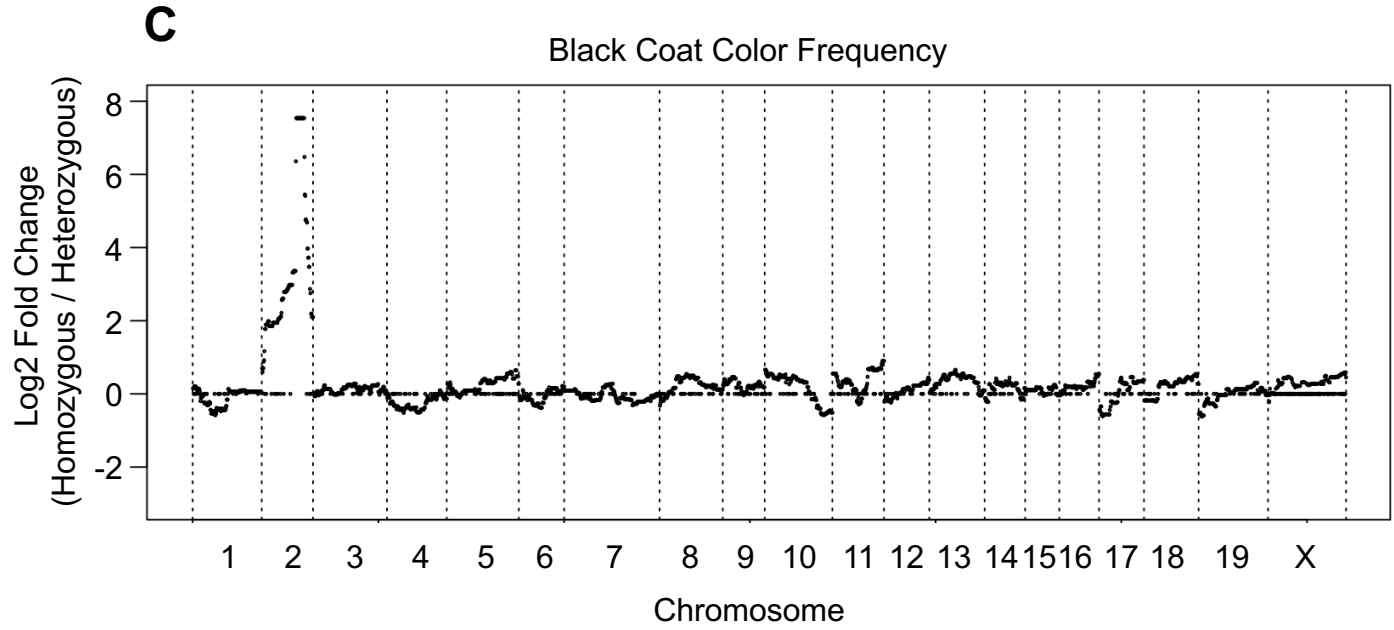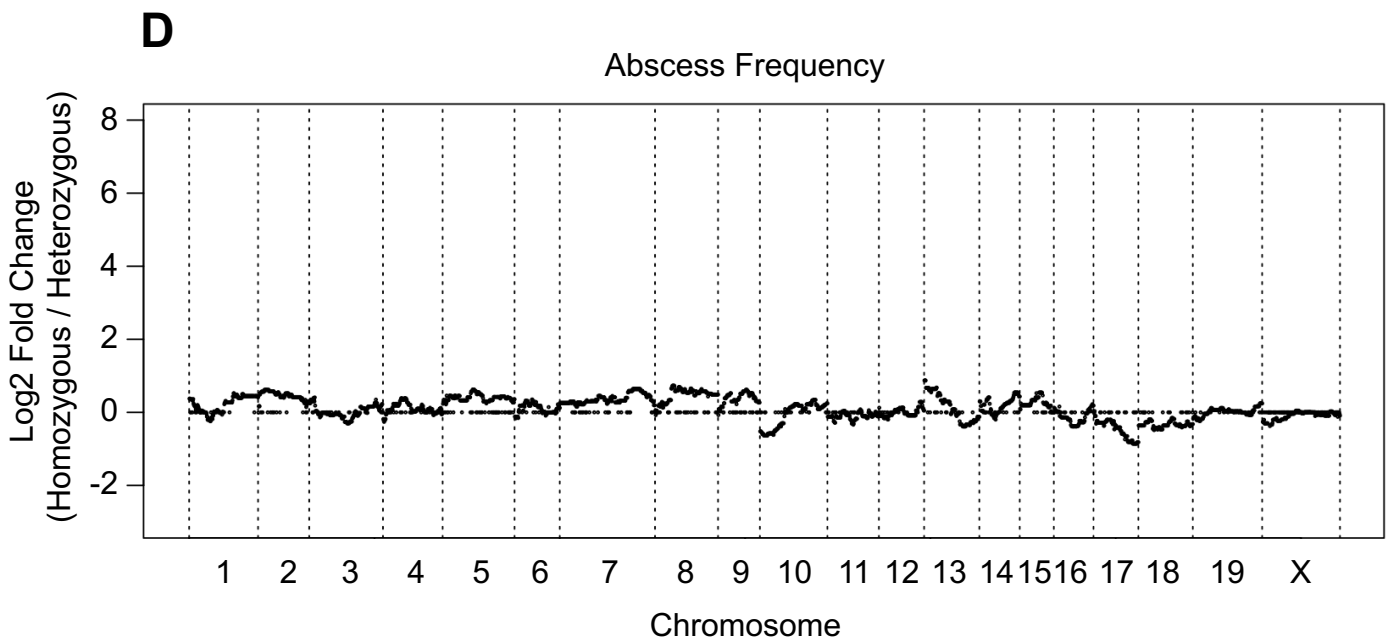

Figure S6

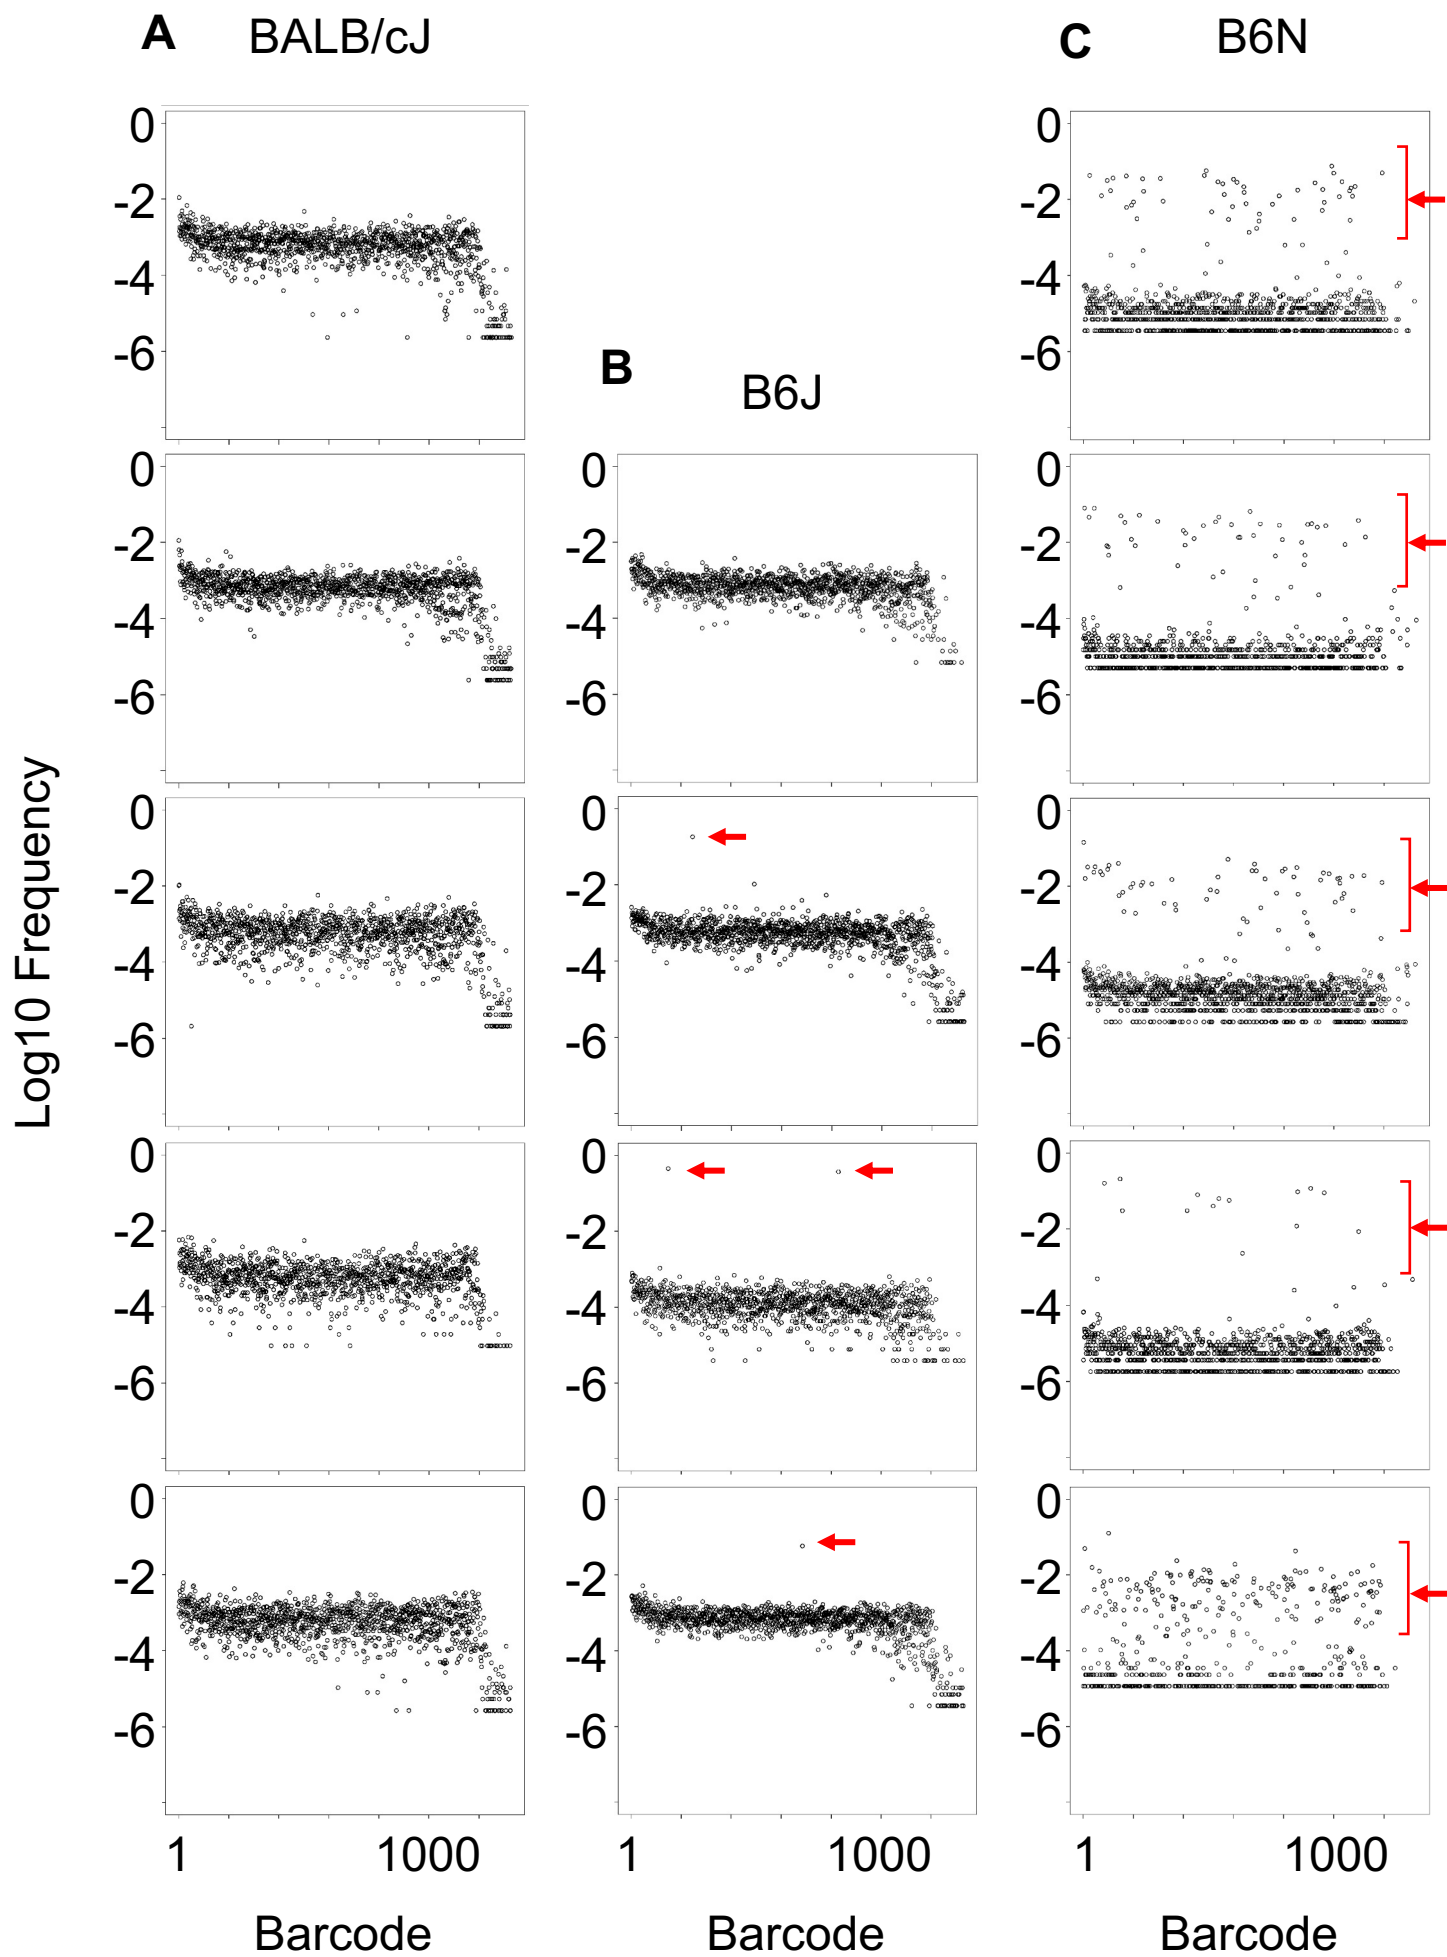

Figure S7

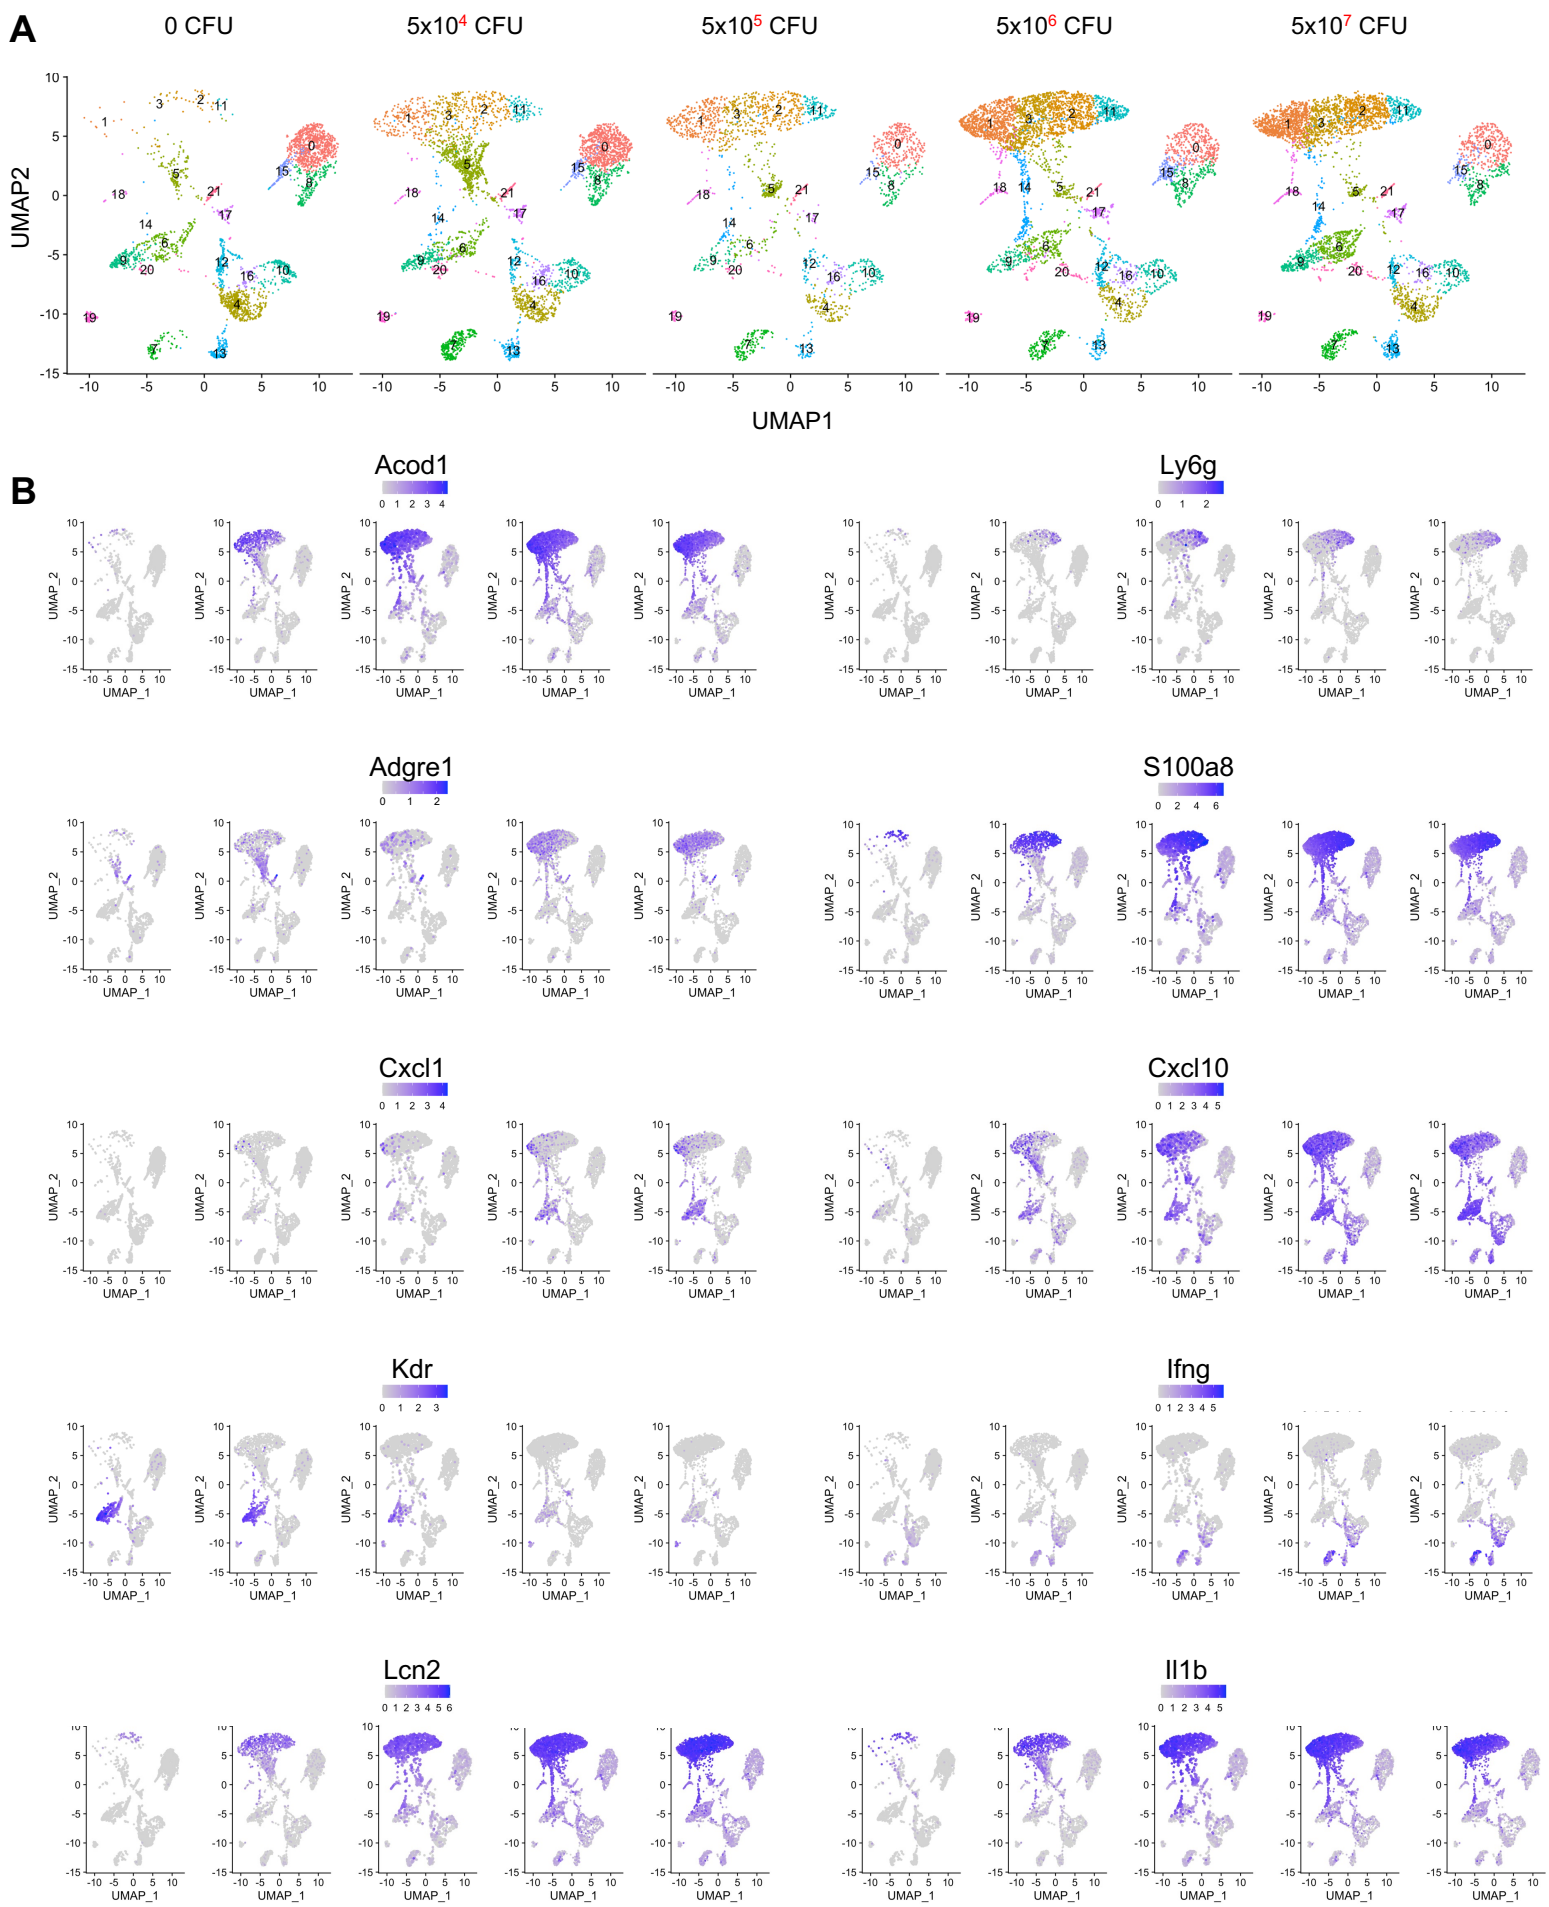

Figure S8



*E. coli*: **Variable**  
Dose: **Variable**  
Sex: **Variable**  
Mouse: **Variable**  
Time: 5 dpi  
Route: IV

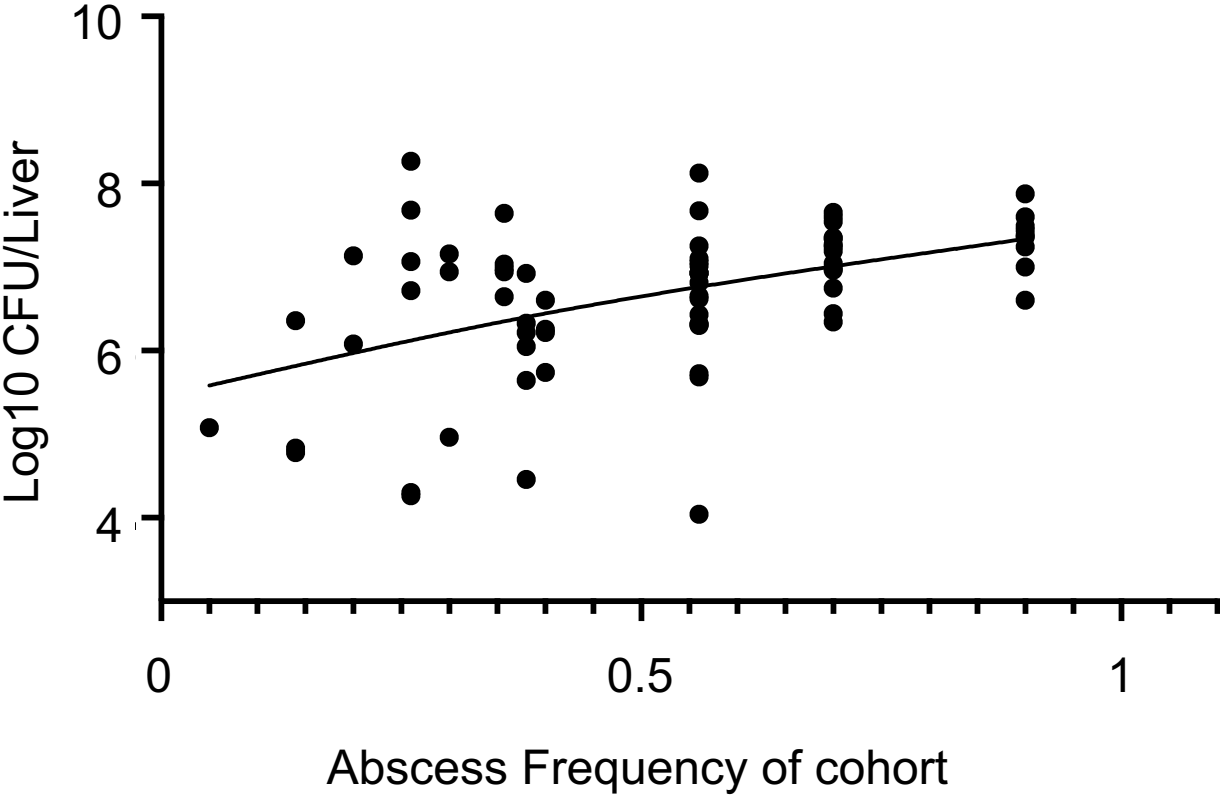

Figure S9

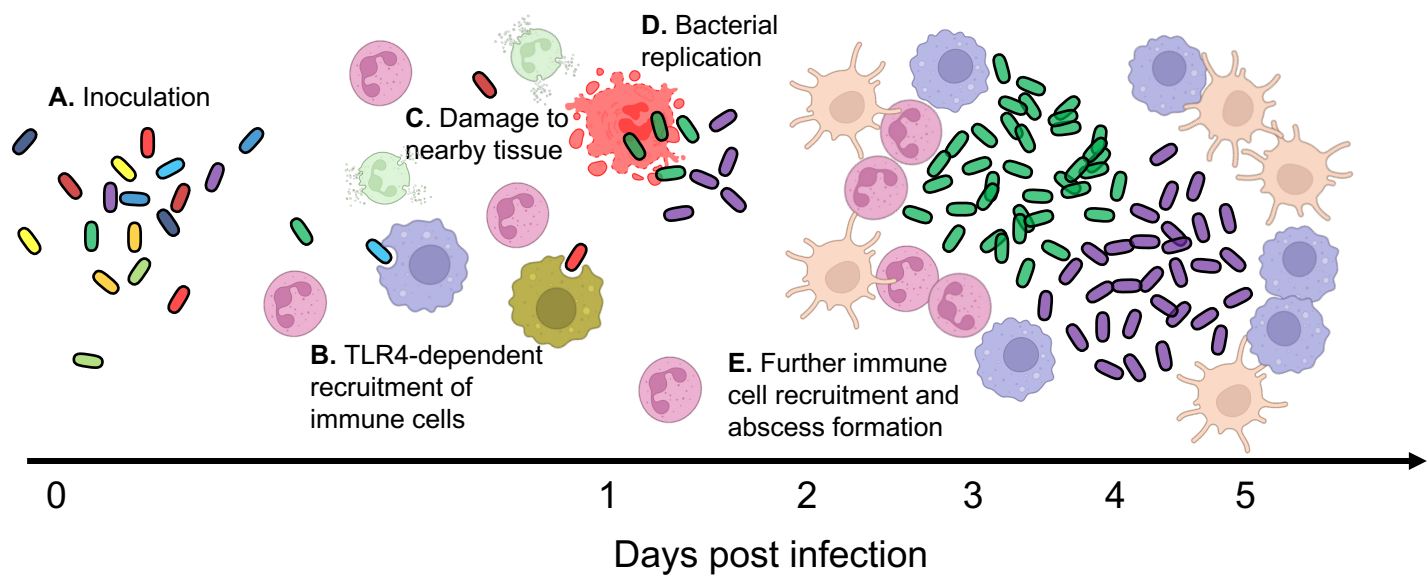

Figure S10
